# Supplementary material for: Sapitinib Reverses Anticancer Drug Resistance in Colon Cancer Cells Overexpressing the ABCB1 Transporter
Source: PubMed Central journal article supplement (PMC7581728; doi:10.3389/fonc.2020.574861), 2020-10-09
Supplement: DataSheet_1.pdf [file DataSheet_1.pdf]

## **Supporting Information**

**Sapitinib reverses anticancer drug resistance in colon cancer cells overexpressing the ABCB1 transporter**

**Hai-Ling Gao<sup>1,2,#</sup>, Pranav Gupta<sup>2,#</sup>, Qingbin Cui<sup>2</sup>, Yunali V. Ashar<sup>2</sup>, Zhuo-Xun Wu<sup>2</sup>, Leli Zeng<sup>2</sup>, Zi-Ning Lei<sup>2</sup>, Charles R. Ashby, Jr.<sup>2</sup>, Qiu-Xu Teng<sup>2</sup>, Dong-Hua Yang<sup>2</sup>, Yingjun Guan<sup>1,\*</sup>, Zhe-Sheng Chen<sup>2,\*</sup>**

## **Legends**

Figure S1. Cell viability for SW620, SW620/Ad300, HEK293 and HEK293/ABCB1 cells after incubation with sapitinib. The data represent the mean  $\pm$  SD.

Table S1. The reversal efficacy of Sapitinib in SW620 and SW620/Ad300 cells.

Table S2. The reversal efficacy of Sapitinib in HCT-15 cells.

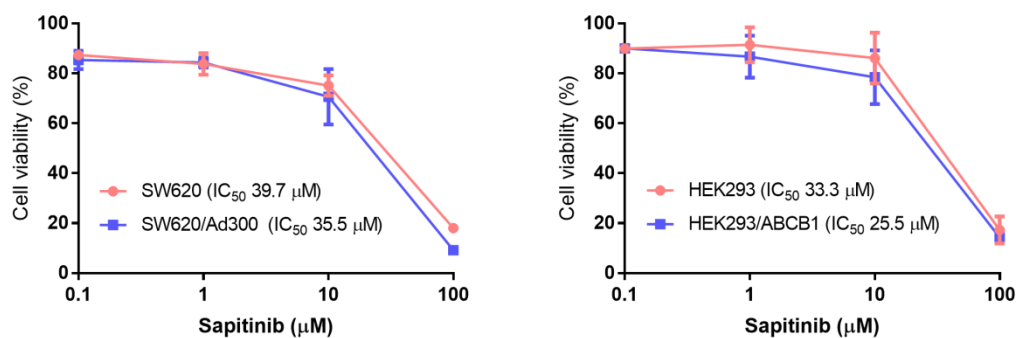

**Figure S1:** Cell viability for SW620, SW620/Ad300, HEK293, and HEK293/ABCB1 cells after incubation with sapitinib

**Table S1**

| Treatment          | IC <sub>50</sub> value ± SD <sup>a</sup> (μM, Resistance fold <sup>b</sup> ) |                       |
|--------------------|------------------------------------------------------------------------------|-----------------------|
|                    | SW620                                                                        | SW620/Ad300           |
| <b>Irinotecan</b>  | 1.05 ± 0.10 (1.00)                                                           | 82.54 ± 13.76 (78.71) |
| + Sapitinib 1 μM   | 1.20 ± 0.16 (1.14)                                                           | 4.39 ± 0.73 (4.18)*   |
| + Sapitinib 5 μM   | 1.18 ± 0.37 (1.12)                                                           | 1.49 ± 0.25 (1.42)*   |
| + Verapamil 5 μM   | 1.19 ± 0.11 (1.13)                                                           | 1.99 ± 0.33 (1.90)*   |
| <b>Oxaliplatin</b> | 13.50 ± 2.25 (1.00)                                                          | 15.60 ± 1.11 (1.16)   |
| + Sapitinib 1 μM   | 16.52 ± 2.75 (1.22)                                                          | 17.09 ± 0.81 (1.27)   |
| + Sapitinib 5 μM   | 12.53 ± 2.09 (0.93)                                                          | 13.87 ± 0.66 (1.03)   |
| + Verapamil 5 μM   | 15.48 ± 2.58 (1.15)                                                          | 17.92 ± 0.85 (1.33)   |

<sup>a</sup> IC<sub>50</sub> values are represented as the means ± SD of at least three independent experiments performed in triplicate.

<sup>b</sup> Rf: Resistance - fold was calculated by dividing the IC<sub>50</sub> values of the substrates in the presence or absence of inhibitor by the IC<sub>50</sub> of the parental cells in the absence of

the inhibitor.

\*  $P < 0.05$  versus the control group in the absence of the reversal compound

**Table S2**

| Treatment          | IC <sub>50</sub> value ± SD <sup>a</sup> (μM, Resistance fold <sup>b</sup> ) |
|--------------------|------------------------------------------------------------------------------|
|                    | HCT-15                                                                       |
| <b>Paclitaxel</b>  | 0.92±0.08 (1.00)                                                             |
| + Sapitinib 1 μM   | 0.60±0.14 (0.65)                                                             |
| + Sapitinib 5 μM   | 0.27±0.04 (0.29) *                                                           |
| + Verapamil 5 μM   | 0.35±0.06 (0.39) *                                                           |
| <b>Doxorubicin</b> | 2.49±0.23 (1.00)                                                             |
| + Sapitinib 1 μM   | 2.15 ±0.20 (0.86)                                                            |
| + Sapitinib 5 μM   | 0.96±0.13 (0.39) *                                                           |
| + Verapamil 5 μM   | 0.71±0.12 (0.28) *                                                           |
| <b>Irinotecan</b>  | 2.34±0.21 (1.00)                                                             |
| + Sapitinib 1 μM   | 0.48±0.11 (0.20) *                                                           |
| + Sapitinib 5 μM   | 0.28±0.04 (0.18) *                                                           |
| + Verapamil 5 μM   | 0.37±0.06 (0.16) *                                                           |
| <b>Oxaliplatin</b> | 0.88±0.08 (1.00)                                                             |
| + Sapitinib 1 μM   | 0.95±0.22 (1.08)                                                             |
| + Sapitinib 5 μM   | 0.94±0.12 (1.07)                                                             |
| + Verapamil 5 μM   | 0.83±0.14 (0.95)                                                             |

<sup>a</sup> IC<sub>50</sub> values are represented as the means ± SD of at least three independent experiments performed in triplicate.

<sup>b</sup> Rf: Resistance - fold was calculated by dividing the IC<sub>50</sub> values of the substrates in

the presence or absence of the inhibitor by the  $IC_{50}$  of the parental cells in the absence of the inhibitor.

\*  $P < 0.05$  versus the control group in the absence of the reversal compound.
